# Supplementary material
Source: publisher figshare collection journal article supplement (https://springernature.figshare.com/ndownloader/files/7189946)
Supplement: Supplementary file [file 7189946]

**Additional file 12.** Summary of resources used in constructing reference regions and evaluating accuracy.

| Resource                                                                                                                                                                                   | Location                                                                       | Purpose                                                                                                                                                                                                                                                                                         |
|--------------------------------------------------------------------------------------------------------------------------------------------------------------------------------------------|--------------------------------------------------------------------------------|-------------------------------------------------------------------------------------------------------------------------------------------------------------------------------------------------------------------------------------------------------------------------------------------------|
| NISTIntegratedCalls_14datasets_131103_a<br>llcall_UGHapMerge_HetHomVarPASS_VQ<br>SRv2.18_all_nouncert_excludesimplerep_e<br>xcludeseqdups_excludedecoy_excludeRep<br>SeqSTRs_noCNVs.vcf.gz | ftp://ftp-<br>trace.ncbi.nih.gov/giab/ftp/data/<br>NA12878/variant_calls/NIST/ | constructing GIBv2.18 high-confident<br>call-set                                                                                                                                                                                                                                                |
| union13callableMQonlymerged_addcert_no<br>uncert_excludesimplerep_excludeseqdups_<br>excludedecoy_excludeRepSeqSTRs_noCN<br>Vs_v2.18_2mindatasets_5minYesNoRatio.b<br>ed.gz                | ftp://ftp-<br>trace.ncbi.nih.gov/giab/ftp/data/<br>NA12878/variant_calls/NIST/ | constructing GIBv2.18 high-confident<br>call-set                                                                                                                                                                                                                                                |
| NISTIntegratedCalls_14datasets_131103_a<br>llcall_UGHapMerge_HetHomVarPASS_VQ<br>SRv2.18_all.primitives.vcf.gz                                                                             | ftp://ftp-<br>trace.ncbi.nih.gov/giab/ftp/data/<br>NA12878/variant_calls/NIST/ | constructing GIBv2.18 less-restrictive<br>call-set                                                                                                                                                                                                                                              |
| union13callableMQonlymerged_addcert_no<br>uncert_v2.18_2mindatasets_5minYesNoRat<br>io.bed.gz                                                                                              | ftp://ftp-<br>trace.ncbi.nih.gov/giab/ftp/data/<br>NA12878/variant_calls/NIST/ | constructing GIBv2.18 less-restrictive<br>call-set                                                                                                                                                                                                                                              |
| Additional_file3.xlsx                                                                                                                                                                      | Included in supplemental<br>spreadsheets                                       | Regions and source databases<br>defining the MIG. Locations based on<br>NCBI annotation (release 105). Used<br>in evaluating coverage and accuracy in<br>medically relevant regions.                                                                                                            |
| Additional_file9.xlsx                                                                                                                                                                      | Included in supplemental<br>spreadsheets                                       | target regions overlapping in ACE, SS,<br>SSCR, NX, NG target files (i.e. the<br>intersection of all WES/ACE specific<br>target regions). These regions are<br>combined with calls in the high-<br>confidence call-set or less-restrictive<br>call-sets to evaluate accuracy among<br>platforms |
| Additional_file10.txt                                                                                                                                                                      | Included in supplemental<br>spreadsheets                                       | target regions aggregated across<br>WES/ACE target files (i.e. the union of<br>all WES/ACE specific target files).<br>These regions are combined with calls<br>in the high-confidence call-set or less-<br>restrictive call-sets to evaluate<br>accuracy among platforms                        |
| Additional_file11.xlsx                                                                                                                                                                     | Included in supplemental<br>spreadsheets                                       | Regions in which the GC fraction was<br>observed to be >70% using a 100bp<br>moving window in NA12878.<br>Combined with calls in the less-<br>restrictive call-set to evaluate accuracy<br>in high-GC regions                                                                                   |
| Platform-specific FASTQ files and .vcf files                                                                                                                                               | SRA PRJNA289286 and<br>available upon request                                  | Sequence data and observed SNV<br>and InDel variant calls                                                                                                                                                                                                                                       |
